# Supplementary material
Source: publisher figshare collection journal article supplement (https://acs.figshare.com/ndownloader/files/5157913)
Supplement: Supplementary file 1 [file 5157913]

 
data_jmei1
 
_audit_creation_method            SHELXL-97 
_chemical_name_systematic 
; 
 ? 
; 
_chemical_name_common             ? 
_chemical_melting_point           ? 
_chemical_formula_moiety          ? 
_chemical_formula_sum 
 '3(C33 H43 Cl3 N3 Sc) 4(C H2 Cl2)' 
_chemical_formula_weight          746.25 
 
loop_ 
 _atom_type_symbol 
 _atom_type_description 
 _atom_type_scat_dispersion_real 
 _atom_type_scat_dispersion_imag 
 _atom_type_scat_source 
 'C'  'C'   0.0033   0.0016 
 'International Tables Vol C Tables 4.2.6.8 and 6.1.1.4' 
 'H'  'H'   0.0000   0.0000 
 'International Tables Vol C Tables 4.2.6.8 and 6.1.1.4' 
 'N'  'N'   0.0061   0.0033 
 'International Tables Vol C Tables 4.2.6.8 and 6.1.1.4' 
 'Cl'  'Cl'   0.1484   0.1585 
 'International Tables Vol C Tables 4.2.6.8 and 6.1.1.4' 
 'Sc'  'Sc'   0.2519   0.3716 
 'International Tables Vol C Tables 4.2.6.8 and 6.1.1.4' 
 
_symmetry_cell_setting            monoclinic 
_symmetry_space_group_name_H-M    P2(1)/n 
 
loop_ 
 _symmetry_equiv_pos_as_xyz 
 'x, y, z' 
 '-x+1/2, y+1/2, -z+1/2' 
 '-x, -y, -z' 
 'x-1/2, -y-1/2, z-1/2' 
 
_cell_length_a                    18.3719(18) 
_cell_length_b                    16.5295(14) 
_cell_length_c                    37.716(4) 
_cell_angle_alpha                 90.00 
_cell_angle_beta                  95.918(4) 
_cell_angle_gamma                 90.00 
_cell_volume                      11392.6(19) 
_cell_formula_units_Z             12 
_cell_measurement_temperature     173(2) 
_cell_measurement_reflns_used     ? 
_cell_measurement_theta_min       ? 
_cell_measurement_theta_max       ? 
 
_exptl_crystal_description        rod
_exptl_crystal_colour             colorless 
_exptl_crystal_size_max           0.25 
_exptl_crystal_size_mid           0.10 
_exptl_crystal_size_min           0.05 
_exptl_crystal_density_meas       ? 
_exptl_crystal_density_diffrn     1.305 
_exptl_crystal_density_method     'not measured' 
_exptl_crystal_F_000              4680 
_exptl_absorpt_coefficient_mu     0.620 
_exptl_absorpt_correction_type    SADABS 
_exptl_absorpt_correction_T_min   0.612828
_exptl_absorpt_correction_T_max   0.9697 
_exptl_absorpt_process_details    ? 
 
_exptl_special_details 
; 
 ? 
; 
 
_diffrn_ambient_temperature       173(2) 
_diffrn_radiation_wavelength      0.71073 
_diffrn_radiation_type            MoK\a 
_diffrn_radiation_source          'fine-focus sealed tube' 
_diffrn_radiation_monochromator   graphite 
_diffrn_measurement_device_type   'Bruker 1K CCD' 
_diffrn_measurement_method        '0.3 deg. omega scans' 
_diffrn_detector_area_resol_mean  ? 
_diffrn_standards_number          ? 
_diffrn_standards_interval_count  ? 
_diffrn_standards_interval_time   ? 
_diffrn_standards_decay_%         ? 
_diffrn_reflns_number             39409 
_diffrn_reflns_av_R_equivalents   0.1248 
_diffrn_reflns_av_sigmaI/netI     0.1455 
_diffrn_reflns_limit_h_min        -18 
_diffrn_reflns_limit_h_max        18 
_diffrn_reflns_limit_k_min        -14 
_diffrn_reflns_limit_k_max        16 
_diffrn_reflns_limit_l_min        -37 
_diffrn_reflns_limit_l_max        37 
_diffrn_reflns_theta_min          1.09 
_diffrn_reflns_theta_max          20.81 
_reflns_number_total              11916 
_reflns_number_gt                 6861 
_reflns_threshold_expression      >2sigma(I) 
 
_computing_data_collection        SMART 
_computing_cell_refinement        SAINT+
_computing_data_reduction         SAINT+ 
_computing_structure_solution     'SHELXS-97 (Sheldrick, 1990)' 
_computing_structure_refinement   'SHELXL-97 (Sheldrick, 1997)' 
_computing_molecular_graphics     SHELXTL 
_computing_publication_material   SHELXTL 
 
_refine_special_details 
; 
 Refinement of F^2^ against ALL reflections.  The weighted R-factor wR and 
 goodness of fit S are based on F^2^, conventional R-factors R are based 
 on F, with F set to zero for negative F^2^. The threshold expression of 
 F^2^ > 2sigma(F^2^) is used only for calculating R-factors(gt) etc. and is 
 not relevant to the choice of reflections for refinement.  R-factors based 
 on F^2^ are statistically about twice as large as those based on F, and R- 
 factors based on ALL data will be even larger. 
; 
 
_refine_ls_structure_factor_coef  Fsqd  
_refine_ls_matrix_type            full 
_refine_ls_weighting_scheme       calc  
_refine_ls_weighting_details 
 'calc w=1/[\s^2^(Fo^2^)+(0.0812P)^2^+0.0000P] where P=(Fo^2^+2Fc^2^)/3' 
_atom_sites_solution_primary      direct 
_atom_sites_solution_secondary    difmap 
_atom_sites_solution_hydrogens    geom 
_refine_ls_hydrogen_treatment     riding 
_refine_ls_extinction_method      none 
_refine_ls_extinction_coef        ? 
_refine_ls_number_reflns          11916 
_refine_ls_number_parameters      1189 
_refine_ls_number_restraints      0 
_refine_ls_R_factor_all           0.1388 
_refine_ls_R_factor_gt            0.0683 
_refine_ls_wR_factor_ref          0.1721 
_refine_ls_wR_factor_gt           0.1448 
_refine_ls_goodness_of_fit_ref    0.991 
_refine_ls_restrained_S_all       0.991 
_refine_ls_shift/su_max           0.410 
_refine_ls_shift/su_mean          0.013 
 
loop_ 
 _atom_site_label 
 _atom_site_type_symbol 
 _atom_site_fract_x 
 _atom_site_fract_y 
 _atom_site_fract_z 
 _atom_site_U_iso_or_equiv 
 _atom_site_adp_type 
 _atom_site_occupancy 
 _atom_site_symmetry_multiplicity 
 _atom_site_calc_flag 
 _atom_site_refinement_flags 
 _atom_site_disorder_assembly 
 _atom_site_disorder_group 
Sc1A Sc 0.82202(8) 0.25697(9) 0.10894(4) 0.0175(4) Uani 1 1 d . . . 
Cl1A Cl 0.93080(13) 0.19133(14) 0.13372(7) 0.0459(7) Uani 1 1 d . . . 
Cl2A Cl 0.87507(12) 0.38793(13) 0.10900(6) 0.0338(6) Uani 1 1 d . . . 
Cl3A Cl 0.74324(13) 0.13685(13) 0.10459(6) 0.0379(7) Uani 1 1 d . . . 
N1A N 0.8317(4) 0.2487(4) 0.04834(17) 0.0212(18) Uani 1 1 d . . . 
N2A N 0.7217(3) 0.3094(4) 0.07956(17) 0.0178(17) Uani 1 1 d . . . 
N3A N 0.7486(4) 0.3128(4) 0.14988(17) 0.0169(16) Uani 1 1 d . . . 
C1A C 0.7706(5) 0.2715(6) -0.0131(2) 0.044(3) Uani 1 1 d . . . 
H1AA H 0.8161 0.2501 -0.0208 0.066 Uiso 1 1 calc R . . 
H1AB H 0.7623 0.3264 -0.0224 0.066 Uiso 1 1 calc R . . 
H1AC H 0.7296 0.2367 -0.0221 0.066 Uiso 1 1 calc R . . 
C2A C 0.7763(5) 0.2735(5) 0.0269(2) 0.030(2) Uani 1 1 d . . . 
C3A C 0.7123(5) 0.3061(5) 0.0442(2) 0.024(2) Uani 1 1 d . . . 
C4A C 0.6483(5) 0.3307(5) 0.0257(2) 0.037(3) Uani 1 1 d . . . 
H4AA H 0.6427 0.3286 0.0004 0.044 Uiso 1 1 calc R . . 
C5A C 0.5919(5) 0.3584(5) 0.0439(2) 0.035(2) Uani 1 1 d . . . 
H5AA H 0.5470 0.3752 0.0313 0.042 Uiso 1 1 calc R . . 
C6A C 0.6017(5) 0.3614(5) 0.0804(2) 0.032(2) Uani 1 1 d . . . 
H6AA H 0.5636 0.3809 0.0933 0.038 Uiso 1 1 calc R . . 
C7A C 0.6675(4) 0.3358(4) 0.0984(2) 0.017(2) Uani 1 1 d . . . 
C8A C 0.6848(5) 0.3371(5) 0.1369(2) 0.019(2) Uani 1 1 d . . . 
C9A C 0.6259(4) 0.3670(5) 0.1584(2) 0.035(3) Uani 1 1 d . . . 
H9AA H 0.6434 0.3644 0.1838 0.052 Uiso 1 1 calc R . . 
H9AB H 0.5823 0.3329 0.1536 0.052 Uiso 1 1 calc R . . 
H9AC H 0.6137 0.4230 0.1517 0.052 Uiso 1 1 calc R . . 
C10A C 0.8961(5) 0.2178(5) 0.03365(19) 0.022(2) Uani 1 1 d . . . 
C11A C 0.9497(5) 0.2721(5) 0.0244(2) 0.037(3) Uani 1 1 d . . . 
C12A C 1.0129(5) 0.2391(6) 0.0125(2) 0.045(3) Uani 1 1 d . . . 
H12A H 1.0495 0.2745 0.0055 0.054 Uiso 1 1 calc R . . 
C13A C 1.0236(5) 0.1578(6) 0.0107(3) 0.043(3) Uani 1 1 d . . . 
H13A H 1.0686 0.1371 0.0041 0.052 Uiso 1 1 calc R . . 
C14A C 0.9698(5) 0.1064(6) 0.0184(2) 0.039(3) Uani 1 1 d . . . 
H14A H 0.9776 0.0498 0.0162 0.046 Uiso 1 1 calc R . . 
C15A C 0.9032(5) 0.1332(5) 0.0294(2) 0.033(2) Uani 1 1 d . . . 
C16A C 0.8437(5) 0.0747(5) 0.0351(2) 0.036(3) Uani 1 1 d . . . 
H16A H 0.8022 0.1057 0.0436 0.043 Uiso 1 1 calc R . . 
C17A C 0.8162(5) 0.0341(6) -0.0002(3) 0.063(3) Uani 1 1 d . . . 
H17A H 0.8011 0.0757 -0.0180 0.095 Uiso 1 1 calc R . . 
H17B H 0.7742 -0.0006 0.0033 0.095 Uiso 1 1 calc R . . 
H17C H 0.8554 0.0013 -0.0086 0.095 Uiso 1 1 calc R . . 
C18A C 0.8675(5) 0.0105(5) 0.0626(3) 0.046(3) Uani 1 1 d . . . 
H18A H 0.8845 0.0366 0.0853 0.069 Uiso 1 1 calc R . . 
H18B H 0.9074 -0.0215 0.0544 0.069 Uiso 1 1 calc R . . 
H18C H 0.8260 -0.0249 0.0659 0.069 Uiso 1 1 calc R . . 
C19A C 0.9426(6) 0.3626(6) 0.0268(3) 0.054(3) Uani 1 1 d . . . 
H19A H 0.8968 0.3750 0.0379 0.065 Uiso 1 1 calc R . . 
C20A C 0.9347(7) 0.3982(6) -0.0112(3) 0.102(5) Uani 1 1 d . . . 
H20A H 0.8921 0.3739 -0.0251 0.153 Uiso 1 1 calc R . . 
H20B H 0.9789 0.3863 -0.0228 0.153 Uiso 1 1 calc R . . 
H20C H 0.9280 0.4569 -0.0100 0.153 Uiso 1 1 calc R . . 
C21A C 1.0080(6) 0.3991(6) 0.0508(3) 0.071(4) Uani 1 1 d . . . 
H21A H 1.0102 0.3748 0.0746 0.106 Uiso 1 1 calc R . . 
H21B H 1.0014 0.4578 0.0527 0.106 Uiso 1 1 calc R . . 
H21C H 1.0536 0.3879 0.0404 0.106 Uiso 1 1 calc R . . 
C22A C 0.7727(4) 0.3231(5) 0.1877(2) 0.021(2) Uani 1 1 d . . . 
C23A C 0.7795(5) 0.2542(5) 0.2101(2) 0.029(2) Uani 1 1 d . . . 
C24A C 0.8052(5) 0.2664(6) 0.2456(2) 0.031(2) Uani 1 1 d . . . 
H24A H 0.8099 0.2213 0.2613 0.037 Uiso 1 1 calc R . . 
C25 C 0.8237(5) 0.3404(6) 0.2584(2) 0.034(3) Uani 1 1 d . . . 
H25A H 0.8415 0.3468 0.2828 0.041 Uiso 1 1 calc R . . 
C26A C 0.8171(5) 0.4063(6) 0.2366(2) 0.034(2) Uani 1 1 d . . . 
H26A H 0.8307 0.4579 0.2462 0.041 Uiso 1 1 calc R . . 
C27A C 0.7912(4) 0.4006(5) 0.2007(2) 0.025(2) Uani 1 1 d . . . 
C28A C 0.7843(4) 0.4782(5) 0.1787(2) 0.023(2) Uani 1 1 d . . . 
H28A H 0.7674 0.4633 0.1535 0.028 Uiso 1 1 calc R . . 
C29A C 0.7263(5) 0.5338(5) 0.1926(2) 0.040(3) Uani 1 1 d . . . 
H29A H 0.6798 0.5046 0.1921 0.060 Uiso 1 1 calc R . . 
H29B H 0.7198 0.5818 0.1774 0.060 Uiso 1 1 calc R . . 
H29C H 0.7425 0.5502 0.2171 0.060 Uiso 1 1 calc R . . 
C30A C 0.8558(5) 0.5232(5) 0.1789(2) 0.037(3) Uani 1 1 d . . . 
H30A H 0.8925 0.4878 0.1699 0.056 Uiso 1 1 calc R . . 
H30B H 0.8725 0.5400 0.2033 0.056 Uiso 1 1 calc R . . 
H30C H 0.8487 0.5711 0.1637 0.056 Uiso 1 1 calc R . . 
C31A C 0.7531(6) 0.1721(5) 0.1968(2) 0.045(3) Uani 1 1 d . . . 
H31A H 0.7453 0.1748 0.1702 0.054 Uiso 1 1 calc R . . 
C32A C 0.8123(5) 0.1078(5) 0.2068(2) 0.052(3) Uani 1 1 d . . . 
H32A H 0.8584 0.1248 0.1980 0.078 Uiso 1 1 calc R . . 
H32B H 0.7968 0.0559 0.1959 0.078 Uiso 1 1 calc R . . 
H32C H 0.8195 0.1019 0.2328 0.078 Uiso 1 1 calc R . . 
C33A C 0.6786(6) 0.1500(6) 0.2103(3) 0.080(4) Uani 1 1 d . . . 
H33A H 0.6431 0.1932 0.2038 0.120 Uiso 1 1 calc R . . 
H33B H 0.6850 0.1439 0.2363 0.120 Uiso 1 1 calc R . . 
H33C H 0.6606 0.0991 0.1994 0.120 Uiso 1 1 calc R . . 
Sc1B Sc 0.22234(8) 0.91157(9) 0.21357(4) 0.0160(4) Uani 1 1 d . . . 
Cl1B Cl 0.25716(13) 0.77874(12) 0.19747(6) 0.0347(6) Uani 1 1 d . . . 
Cl2B Cl 0.26475(11) 0.96689(12) 0.15843(5) 0.0249(6) Uani 1 1 d . . . 
Cl3B Cl 0.18342(11) 0.87197(12) 0.26948(5) 0.0238(5) Uani 1 1 d . . . 
N1B N 0.3094(3) 0.9879(4) 0.24782(16) 0.0157(16) Uani 1 1 d . . . 
N2B N 0.1836(3) 1.0392(4) 0.21663(16) 0.0125(16) Uani 1 1 d . . . 
N3B N 0.1002(3) 0.9195(4) 0.19112(15) 0.0135(16) Uani 1 1 d . . . 
C1B C 0.3575(4) 1.1249(5) 0.2612(2) 0.028(2) Uani 1 1 d . . . 
H1BA H 0.3999 1.0962 0.2731 0.042 Uiso 1 1 calc R . . 
H1BB H 0.3360 1.1596 0.2784 0.042 Uiso 1 1 calc R . . 
H1BC H 0.3732 1.1582 0.2418 0.042 Uiso 1 1 calc R . . 
C2B C 0.3019(4) 1.0648(5) 0.2461(2) 0.017(2) Uani 1 1 d . . . 
C3B C 0.2325(4) 1.0966(5) 0.2275(2) 0.016(2) Uani 1 1 d . . . 
C4B C 0.2163(5) 1.1772(5) 0.2227(2) 0.024(2) Uani 1 1 d . . . 
H4BA H 0.2511 1.2174 0.2308 0.028 Uiso 1 1 calc R . . 
C5B C 0.1491(5) 1.1991(5) 0.2061(2) 0.024(2) Uani 1 1 d . . . 
H5BA H 0.1377 1.2547 0.2024 0.029 Uiso 1 1 calc R . . 
C6B C 0.0981(5) 1.1411(5) 0.1949(2) 0.023(2) Uani 1 1 d . . . 
H6BA H 0.0508 1.1556 0.1842 0.028 Uiso 1 1 calc R . . 
C7B C 0.1184(4) 1.0598(5) 0.1997(2) 0.018(2) Uani 1 1 d . . . 
C8B C 0.0698(4) 0.9903(5) 0.1876(2) 0.017(2) Uani 1 1 d . . . 
C9B C -0.0056(4) 1.0081(5) 0.1712(2) 0.030(2) Uani 1 1 d . . . 
H9BA H -0.0310 0.9573 0.1646 0.045 Uiso 1 1 calc R . . 
H9BB H -0.0032 1.0415 0.1499 0.045 Uiso 1 1 calc R . . 
H9BC H -0.0325 1.0374 0.1884 0.045 Uiso 1 1 calc R . . 
C10B C 0.3694(4) 0.9522(5) 0.2708(2) 0.019(2) Uiso 1 1 d . . . 
C11B C 0.3676(4) 0.9518(5) 0.3076(2) 0.021(2) Uani 1 1 d . . . 
C12B C 0.4234(5) 0.9126(5) 0.3279(2) 0.033(2) Uani 1 1 d . . . 
H12B H 0.4230 0.9117 0.3531 0.039 Uiso 1 1 calc R . . 
C13B C 0.4802(5) 0.8741(5) 0.3130(3) 0.037(3) Uani 1 1 d . . . 
H13B H 0.5178 0.8474 0.3278 0.045 Uiso 1 1 calc R . . 
C14B C 0.4813(5) 0.8753(5) 0.2774(2) 0.029(2) Uani 1 1 d . . . 
H14B H 0.5200 0.8492 0.2670 0.035 Uiso 1 1 calc R . . 
C15B C 0.4263(4) 0.9145(5) 0.2554(2) 0.026(2) Uani 1 1 d . . . 
C16B C 0.4337(5) 0.9198(6) 0.2154(2) 0.038(3) Uani 1 1 d . . . 
H16B H 0.3840 0.9308 0.2030 0.045 Uiso 1 1 calc R . . 
C17B C 0.4830(6) 0.9894(7) 0.2074(3) 0.073(4) Uani 1 1 d . . . 
H17D H 0.4643 1.0397 0.2168 0.110 Uiso 1 1 calc R . . 
H17E H 0.4840 0.9942 0.1815 0.110 Uiso 1 1 calc R . . 
H17F H 0.5327 0.9794 0.2187 0.110 Uiso 1 1 calc R . . 
C18B C 0.4617(5) 0.8417(6) 0.2001(3) 0.063(3) Uani 1 1 d . . . 
H18D H 0.4283 0.7972 0.2042 0.095 Uiso 1 1 calc R . . 
H18E H 0.5106 0.8295 0.2117 0.095 Uiso 1 1 calc R . . 
H18F H 0.4640 0.8482 0.1744 0.095 Uiso 1 1 calc R . . 
C19B C 0.3094(4) 0.9942(5) 0.3268(2) 0.033(2) Uani 1 1 d . . . 
H19B H 0.2713 1.0164 0.3086 0.039 Uiso 1 1 calc R . . 
C20B C 0.3429(5) 1.0648(6) 0.3496(2) 0.050(3) Uani 1 1 d . . . 
H20D H 0.3670 1.1024 0.3344 0.074 Uiso 1 1 calc R . . 
H20E H 0.3789 1.0438 0.3683 0.074 Uiso 1 1 calc R . . 
H20F H 0.3041 1.0933 0.3606 0.074 Uiso 1 1 calc R . . 
C21B C 0.2720(5) 0.9366(6) 0.3513(2) 0.052(3) Uani 1 1 d . . . 
H21D H 0.2501 0.8913 0.3373 0.078 Uiso 1 1 calc R . . 
H21E H 0.2338 0.9659 0.3623 0.078 Uiso 1 1 calc R . . 
H21F H 0.3084 0.9159 0.3699 0.078 Uiso 1 1 calc R . . 
C22B C 0.0574(4) 0.8490(5) 0.1801(2) 0.016(2) Uiso 1 1 d . . . 
C23B C 0.0643(4) 0.8160(5) 0.1468(2) 0.018(2) Uani 1 1 d . . . 
C24B C 0.0301(4) 0.7437(5) 0.1377(2) 0.030(2) Uani 1 1 d . . . 
H24B H 0.0332 0.7213 0.1147 0.036 Uiso 1 1 calc R . . 
C25B C -0.0090(4) 0.7031(5) 0.1619(2) 0.030(2) Uani 1 1 d . . . 
H25B H -0.0297 0.6516 0.1559 0.036 Uiso 1 1 calc R . . 
C26B C -0.0176(4) 0.7373(5) 0.1943(2) 0.025(2) Uani 1 1 d . . . 
H26B H -0.0465 0.7105 0.2101 0.030 Uiso 1 1 calc R . . 
C27B C 0.0150(4) 0.8099(5) 0.2041(2) 0.019(2) Uani 1 1 d . . . 
C28B C -0.0024(4) 0.8473(5) 0.2396(2) 0.019(2) Uani 1 1 d . . . 
H28B H 0.0308 0.8948 0.2447 0.023 Uiso 1 1 calc R . . 
C29B C -0.0801(4) 0.8776(5) 0.2373(2) 0.031(2) Uani 1 1 d . . . 
H29D H -0.0885 0.9161 0.2176 0.046 Uiso 1 1 calc R . . 
H29E H -0.0884 0.9046 0.2597 0.046 Uiso 1 1 calc R . . 
H29F H -0.1139 0.8319 0.2333 0.046 Uiso 1 1 calc R . . 
C30B C 0.0118(4) 0.7876(5) 0.2710(2) 0.027(2) Uani 1 1 d . . . 
H30D H 0.0006 0.8140 0.2930 0.040 Uiso 1 1 calc R . . 
H30E H 0.0633 0.7711 0.2733 0.040 Uiso 1 1 calc R . . 
H30F H -0.0194 0.7399 0.2665 0.040 Uiso 1 1 calc R . . 
C31B C 0.1038(4) 0.8600(5) 0.1188(2) 0.028(2) Uani 1 1 d . . . 
H31B H 0.1317 0.9059 0.1309 0.033 Uiso 1 1 calc R . . 
C32B C 0.1578(5) 0.8071(6) 0.1017(2) 0.050(3) Uani 1 1 d . . . 
H32D H 0.1933 0.7847 0.1203 0.075 Uiso 1 1 calc R . . 
H32E H 0.1834 0.8396 0.0852 0.075 Uiso 1 1 calc R . . 
H32F H 0.1315 0.7629 0.0887 0.075 Uiso 1 1 calc R . . 
C33B C 0.0490(5) 0.8955(6) 0.0900(3) 0.056(3) Uani 1 1 d . . . 
H33D H 0.0753 0.9247 0.0726 0.084 Uiso 1 1 calc R . . 
H33E H 0.0165 0.9330 0.1009 0.084 Uiso 1 1 calc R . . 
H33F H 0.0201 0.8518 0.0780 0.084 Uiso 1 1 calc R . . 
Sc1C Sc -0.06796(8) 1.18821(9) 0.40338(4) 0.0203(4) Uani 1 1 d . . . 
Cl1C Cl -0.13968(14) 1.07038(15) 0.40650(7) 0.0541(8) Uani 1 1 d . . . 
Cl2C Cl -0.01338(12) 1.18390(13) 0.46513(5) 0.0321(6) Uani 1 1 d . . . 
Cl3C Cl -0.10042(12) 1.21820(14) 0.34207(5) 0.0332(6) Uani 1 1 d . . . 
N1C N -0.1318(4) 1.3043(4) 0.41840(16) 0.0225(18) Uani 1 1 d . . . 
N2C N 0.0047(4) 1.2969(4) 0.40261(16) 0.0182(17) Uani 1 1 d . . . 
N3C N 0.0464(4) 1.1500(4) 0.38752(16) 0.0192(17) Uani 1 1 d . . . 
C1C C -0.1331(5) 1.4534(5) 0.4234(3) 0.041(3) Uani 1 1 d . . . 
H1CA H -0.1837 1.4454 0.4287 0.061 Uiso 1 1 calc R . . 
H1CB H -0.1326 1.4873 0.4021 0.061 Uiso 1 1 calc R . . 
H1CC H -0.1052 1.4800 0.4437 0.061 Uiso 1 1 calc R . . 
C2C C -0.0992(4) 1.3732(5) 0.4169(2) 0.021(2) Uani 1 1 d . . . 
C3C C -0.0215(4) 1.3716(5) 0.4088(2) 0.021(2) Uani 1 1 d . . . 
C4C C 0.0225(5) 1.4391(5) 0.4071(2) 0.032(2) Uani 1 1 d . . . 
H4CA H 0.0036 1.4916 0.4106 0.038 Uiso 1 1 calc R . . 
C5C C 0.0942(5) 1.4292(6) 0.4002(2) 0.040(3) Uani 1 1 d . . . 
H5CA H 0.1251 1.4752 0.3997 0.048 Uiso 1 1 calc R . . 
C6C C 0.1217(5) 1.3539(5) 0.3942(2) 0.029(2) Uani 1 1 d . . . 
H6CA H 0.1709 1.3472 0.3891 0.034 Uiso 1 1 calc R . . 
C7C C 0.0755(5) 1.2879(5) 0.3956(2) 0.022(2) Uani 1 1 d . . . 
C8C C 0.0977(4) 1.2054(5) 0.3882(2) 0.021(2) Uani 1 1 d . . . 
C9C C 0.1737(4) 1.1879(5) 0.3816(2) 0.030(2) Uani 1 1 d . . . 
H9CA H 0.1791 1.1298 0.3774 0.045 Uiso 1 1 calc R . . 
H9CB H 0.2069 1.2040 0.4024 0.045 Uiso 1 1 calc R . . 
H9CC H 0.1858 1.2182 0.3607 0.045 Uiso 1 1 calc R . . 
C10C C -0.2075(4) 1.3020(5) 0.4269(2) 0.018(2) Uani 1 1 d . . . 
C11C C -0.2653(5) 1.3084(5) 0.3996(2) 0.027(2) Uani 1 1 d . . . 
C12C C -0.3363(5) 1.3004(5) 0.4080(3) 0.034(2) Uani 1 1 d . . . 
H12C H -0.3757 1.3035 0.3897 0.041 Uiso 1 1 calc R . . 
C13C C -0.3506(5) 1.2880(5) 0.4427(3) 0.038(3) Uani 1 1 d . . . 
H13C H -0.3996 1.2809 0.4480 0.045 Uiso 1 1 calc R . . 
C14C C -0.2938(5) 1.2857(5) 0.4698(3) 0.038(3) Uani 1 1 d . . . 
H14C H -0.3046 1.2798 0.4938 0.045 Uiso 1 1 calc R . . 
C15C C -0.2210(5) 1.2919(5) 0.4627(2) 0.029(2) Uani 1 1 d . . . 
C16C C -0.1614(5) 1.2922(5) 0.4935(2) 0.032(2) Uani 1 1 d . . . 
H16C H -0.1132 1.2966 0.4835 0.038 Uiso 1 1 calc R . . 
C17C C -0.1692(6) 1.3655(6) 0.5178(2) 0.062(3) Uani 1 1 d . . . 
H17G H -0.1677 1.4153 0.5038 0.093 Uiso 1 1 calc R . . 
H17H H -0.1290 1.3657 0.5370 0.093 Uiso 1 1 calc R . . 
H17I H -0.2160 1.3622 0.5281 0.093 Uiso 1 1 calc R . . 
C18C C -0.1616(6) 1.2132(6) 0.5149(3) 0.061(3) Uani 1 1 d . . . 
H18G H -0.1222 1.2147 0.5346 0.092 Uiso 1 1 calc R . . 
H18H H -0.1539 1.1673 0.4993 0.092 Uiso 1 1 calc R . . 
H18I H -0.2088 1.2071 0.5246 0.092 Uiso 1 1 calc R . . 
C19C C -0.2529(5) 1.3253(5) 0.3607(2) 0.027(2) Uani 1 1 d . . . 
H19C H -0.1990 1.3282 0.3591 0.032 Uiso 1 1 calc R . . 
C20C C -0.2863(5) 1.4054(6) 0.3488(2) 0.047(3) Uani 1 1 d . . . 
H20G H -0.2659 1.4483 0.3648 0.071 Uiso 1 1 calc R . . 
H20H H -0.3394 1.4030 0.3495 0.071 Uiso 1 1 calc R . . 
H20I H -0.2753 1.4170 0.3245 0.071 Uiso 1 1 calc R . . 
C21C C -0.2843(4) 1.2569(6) 0.3366(2) 0.044(3) Uani 1 1 d . . . 
H21G H -0.2626 1.2054 0.3451 0.066 Uiso 1 1 calc R . . 
H21H H -0.2729 1.2668 0.3121 0.066 Uiso 1 1 calc R . . 
H21I H -0.3375 1.2546 0.3371 0.066 Uiso 1 1 calc R . . 
C22C C 0.0620(4) 1.0671(5) 0.3780(2) 0.020(2) Uani 1 1 d . . . 
C23C C 0.0846(4) 1.0102(5) 0.4047(2) 0.027(2) Uani 1 1 d . . . 
C24C C 0.0888(4) 0.9290(5) 0.3943(2) 0.030(2) Uani 1 1 d . . . 
H24C H 0.1025 0.8889 0.4118 0.037 Uiso 1 1 calc R . . 
C25C C 0.0733(5) 0.9063(5) 0.3592(3) 0.034(2) Uani 1 1 d . . . 
H25C H 0.0750 0.8508 0.3528 0.041 Uiso 1 1 calc R . . 
C26C C 0.0554(5) 0.9635(6) 0.3336(3) 0.033(2) Uani 1 1 d . . . 
H26C H 0.0467 0.9470 0.3094 0.040 Uiso 1 1 calc R . . 
C27C C 0.0496(4) 1.0438(5) 0.3419(2) 0.024(2) Uani 1 1 d . . . 
C28C C 0.0390(5) 1.1051(5) 0.3113(2) 0.032(2) Uani 1 1 d . . . 
H28C H 0.0305 1.1596 0.3216 0.038 Uiso 1 1 calc R . . 
C29C C 0.1103(4) 1.1081(5) 0.2935(2) 0.036(3) Uani 1 1 d . . . 
H29G H 0.1052 1.1472 0.2738 0.054 Uiso 1 1 calc R . . 
H29H H 0.1206 1.0544 0.2842 0.054 Uiso 1 1 calc R . . 
H29I H 0.1506 1.1246 0.3110 0.054 Uiso 1 1 calc R . . 
C30C C -0.0241(5) 1.0861(5) 0.2834(2) 0.039(3) Uani 1 1 d . . . 
H30G H -0.0700 1.0861 0.2946 0.058 Uiso 1 1 calc R . . 
H30H H -0.0166 1.0328 0.2731 0.058 Uiso 1 1 calc R . . 
H30I H -0.0265 1.1273 0.2646 0.058 Uiso 1 1 calc R . . 
C31C C 0.1105(4) 1.0336(5) 0.4422(2) 0.025(2) Uani 1 1 d . . . 
H31C H 0.1033 1.0932 0.4445 0.030 Uiso 1 1 calc R . . 
C32C C 0.0691(5) 0.9927(5) 0.4688(2) 0.037(3) Uani 1 1 d . . . 
H32G H 0.0169 1.0055 0.4639 0.056 Uiso 1 1 calc R . . 
H32H H 0.0870 1.0114 0.4928 0.056 Uiso 1 1 calc R . . 
H32I H 0.0760 0.9340 0.4673 0.056 Uiso 1 1 calc R . . 
C33C C 0.1942(4) 1.0159(5) 0.4497(2) 0.039(3) Uani 1 1 d . . . 
H33G H 0.2113 1.0323 0.4741 0.058 Uiso 1 1 calc R . . 
H33H H 0.2208 1.0463 0.4329 0.058 Uiso 1 1 calc R . . 
H33I H 0.2030 0.9579 0.4469 0.058 Uiso 1 1 calc R . . 
Cl1S Cl 0.6330(2) 0.1105(2) -0.00238(10) 0.1125(13) Uani 1 1 d . A . 
Cl2S Cl 0.5440(4) 0.1522(4) 0.0561(2) 0.098(3) Uani 0.508(7) 1 d P A 1 
Cl2S Cl 0.5000(4) 0.0730(4) 0.0132(2) 0.097(3) Uani 0.492(7) 1 d P A 2 
Cl3S Cl 0.4388(3) 0.1556(3) 0.12148(14) 0.154(2) Uani 1 1 d . . . 
Cl4S Cl 0.3260(2) 0.2190(2) 0.15971(10) 0.1182(15) Uani 1 1 d . . . 
Cl5S Cl 0.1381(2) 1.1075(2) 0.10442(10) 0.1104(14) Uani 1 1 d . . . 
Cl6S Cl 0.1763(2) 1.2627(2) 0.07689(9) 0.1046(12) Uani 1 1 d . . . 
Cl7S Cl 0.3029(2) 0.9541(3) 0.52868(10) 0.1311(17) Uani 1 1 d . . . 
Cl8S Cl 0.41851(15) 0.90408(16) 0.58104(8) 0.0630(8) Uani 1 1 d . . . 
C1S C 0.5553(8) 0.1427(8) 0.0131(4) 0.100(5) Uani 1 1 d . . . 
C2S C 0.3482(8) 0.1533(8) 0.1303(5) 0.168(9) Uani 1 1 d . . . 
H2SA H 0.3168 0.1627 0.1078 0.202 Uiso 1 1 calc R . . 
H2SB H 0.3371 0.0985 0.1388 0.202 Uiso 1 1 calc R . . 
C3S C 0.1161(8) 1.2098(7) 0.1002(3) 0.107(6) Uani 1 1 d . . . 
H3SA H 0.0661 1.2153 0.0878 0.129 Uiso 1 1 calc R . . 
H3SB H 0.1160 1.2338 0.1243 0.129 Uiso 1 1 calc R . . 
C4S C 0.3245(5) 0.9227(6) 0.5718(2) 0.053(3) Uani 1 1 d . . . 
H4SA H 0.2970 0.8727 0.5760 0.064 Uiso 1 1 calc R . . 
H4SB H 0.3095 0.9648 0.5883 0.064 Uiso 1 1 calc R . . 
 
loop_ 
 _atom_site_aniso_label 
 _atom_site_aniso_U_11 
 _atom_site_aniso_U_22 
 _atom_site_aniso_U_33 
 _atom_site_aniso_U_23 
 _atom_site_aniso_U_13 
 _atom_site_aniso_U_12 
Sc1A 0.0176(9) 0.0190(10) 0.0160(9) 0.0001(8) 0.0021(8) 0.0043(8) 
Cl1A 0.0387(15) 0.0410(16) 0.0539(17) 0.0052(13) -0.0150(13) 0.0163(13) 
Cl2A 0.0391(15) 0.0268(14) 0.0366(14) 0.0009(11) 0.0085(12) -0.0073(12) 
Cl3A 0.0501(16) 0.0278(14) 0.0388(15) -0.0042(12) 0.0187(13) -0.0101(13) 
N1A 0.030(5) 0.016(4) 0.020(4) 0.003(3) 0.011(4) 0.005(4) 
N2A 0.018(4) 0.015(4) 0.019(5) -0.001(3) -0.005(4) 0.002(3) 
N3A 0.023(5) 0.008(4) 0.021(4) 0.002(3) 0.005(4) 0.003(4) 
C1A 0.064(7) 0.056(7) 0.013(5) 0.003(5) 0.006(5) 0.017(6) 
C2A 0.046(7) 0.019(5) 0.023(6) -0.003(5) 0.000(5) 0.006(5) 
C3A 0.031(6) 0.016(5) 0.024(6) 0.002(5) -0.007(5) 0.005(5) 
C4A 0.053(7) 0.041(6) 0.016(5) -0.012(5) -0.002(6) 0.009(6) 
C5A 0.033(6) 0.037(6) 0.033(7) -0.004(5) -0.013(5) 0.016(5) 
C6A 0.032(6) 0.025(6) 0.038(7) -0.012(5) 0.001(5) 0.006(5) 
C7A 0.015(5) 0.009(5) 0.024(6) -0.006(4) -0.004(5) 0.011(4) 
C8A 0.016(5) 0.017(5) 0.025(6) 0.002(4) 0.003(5) 0.006(4) 
C9A 0.021(5) 0.050(7) 0.034(6) -0.006(5) 0.007(5) 0.012(5) 
C10A 0.033(6) 0.024(6) 0.010(5) 0.004(4) 0.008(4) 0.005(5) 
C11A 0.055(7) 0.025(6) 0.037(6) -0.003(5) 0.026(6) 0.000(6) 
C12A 0.042(7) 0.041(7) 0.057(7) -0.008(6) 0.029(6) -0.016(6) 
C13A 0.039(7) 0.033(7) 0.064(8) -0.006(6) 0.035(6) 0.006(6) 
C14A 0.050(7) 0.025(6) 0.045(6) -0.013(5) 0.024(6) 0.011(6) 
C15A 0.041(7) 0.027(6) 0.034(6) 0.001(5) 0.011(5) -0.002(6) 
C16A 0.043(6) 0.027(6) 0.040(6) -0.005(5) 0.020(5) 0.003(5) 
C17A 0.057(8) 0.059(8) 0.073(9) -0.033(7) 0.000(7) -0.001(6) 
C18A 0.050(7) 0.034(6) 0.056(7) 0.007(6) 0.008(6) -0.001(5) 
C19A 0.064(8) 0.035(7) 0.072(8) 0.003(6) 0.047(7) -0.003(6) 
C20A 0.149(13) 0.036(7) 0.139(13) 0.043(8) 0.105(11) 0.009(8) 
C21A 0.074(9) 0.022(6) 0.127(11) -0.030(7) 0.060(9) -0.012(6) 
C22A 0.017(5) 0.031(6) 0.015(5) 0.001(5) 0.007(4) 0.009(5) 
C23A 0.039(6) 0.026(6) 0.023(6) 0.008(5) 0.009(5) 0.011(5) 
C24A 0.046(6) 0.036(7) 0.011(6) 0.007(5) -0.001(5) 0.012(5) 
C25 0.043(7) 0.048(7) 0.009(5) -0.002(6) -0.008(5) 0.012(6) 
C26A 0.032(6) 0.041(7) 0.028(6) -0.010(6) 0.001(5) 0.005(5) 
C27A 0.016(5) 0.031(6) 0.029(6) -0.007(5) 0.002(5) 0.005(5) 
C28A 0.025(5) 0.021(5) 0.022(5) -0.010(4) 0.000(4) 0.003(5) 
C29A 0.038(6) 0.038(6) 0.044(6) -0.011(5) 0.003(5) 0.011(5) 
C30A 0.042(6) 0.032(6) 0.038(6) -0.001(5) 0.003(5) -0.004(5) 
C31A 0.081(9) 0.025(6) 0.027(6) 0.014(5) -0.004(6) 0.004(6) 
C32A 0.082(8) 0.033(6) 0.045(7) -0.001(5) 0.024(6) 0.015(6) 
C33A 0.063(9) 0.036(7) 0.136(12) 0.014(7) -0.009(8) -0.018(7) 
Sc1B 0.0137(9) 0.0141(9) 0.0196(9) -0.0011(8) -0.0008(7) 0.0002(8) 
Cl1B 0.0500(16) 0.0170(13) 0.0382(15) -0.0046(11) 0.0103(12) 0.0065(12) 
Cl2B 0.0228(13) 0.0284(13) 0.0240(13) -0.0005(11) 0.0054(11) 0.0004(11) 
Cl3B 0.0243(13) 0.0239(13) 0.0230(13) 0.0013(10) 0.0014(10) -0.0024(11) 
N1B 0.007(4) 0.021(5) 0.018(4) 0.000(3) -0.002(3) 0.001(4) 
N2B 0.007(4) 0.014(4) 0.017(4) 0.000(3) 0.004(3) 0.004(4) 
N3B 0.007(4) 0.020(4) 0.013(4) 0.004(3) 0.001(3) 0.006(4) 
C1B 0.027(5) 0.019(5) 0.037(6) -0.001(5) -0.001(5) 0.000(5) 
C2B 0.014(5) 0.019(6) 0.019(5) -0.003(4) 0.001(4) -0.006(5) 
C3B 0.017(5) 0.014(5) 0.018(5) -0.006(4) 0.007(4) -0.006(5) 
C4B 0.031(6) 0.011(5) 0.030(6) -0.004(4) 0.005(5) -0.010(5) 
C5B 0.031(6) 0.026(6) 0.014(5) 0.005(4) -0.008(5) -0.002(5) 
C6B 0.022(5) 0.020(6) 0.028(6) 0.000(5) 0.001(4) 0.011(5) 
C7B 0.017(6) 0.021(6) 0.016(5) -0.005(4) 0.007(4) 0.007(5) 
C8B 0.007(5) 0.033(6) 0.012(5) 0.000(4) 0.003(4) -0.003(5) 
C9B 0.018(5) 0.024(5) 0.046(6) 0.005(5) -0.008(5) 0.004(5) 
C11B 0.014(5) 0.019(5) 0.029(6) 0.004(4) -0.007(5) -0.002(4) 
C12B 0.038(6) 0.031(6) 0.028(6) 0.005(5) 0.000(5) -0.015(5) 
C13B 0.031(6) 0.034(6) 0.043(7) 0.008(5) -0.017(5) 0.004(5) 
C14B 0.021(6) 0.022(6) 0.042(7) -0.018(5) -0.005(5) 0.007(5) 
C15B 0.018(5) 0.022(5) 0.037(6) -0.002(5) -0.010(5) -0.007(5) 
C16B 0.025(6) 0.052(7) 0.035(6) -0.007(6) -0.002(5) 0.011(6) 
C17B 0.102(10) 0.076(9) 0.047(8) 0.005(7) 0.035(7) 0.010(8) 
C18B 0.050(7) 0.078(9) 0.060(8) -0.031(7) -0.001(6) 0.017(7) 
C19B 0.022(5) 0.050(7) 0.023(5) 0.001(5) -0.004(5) -0.004(5) 
C20B 0.039(7) 0.062(7) 0.045(7) -0.015(6) -0.004(5) 0.001(6) 
C21B 0.033(6) 0.090(9) 0.033(6) 0.001(6) 0.003(5) -0.022(6) 
C23B 0.008(5) 0.018(5) 0.028(5) -0.010(4) -0.001(4) -0.004(4) 
C24B 0.011(5) 0.046(7) 0.033(6) -0.020(5) -0.001(5) 0.008(5) 
C25B 0.022(6) 0.021(6) 0.046(7) -0.007(5) -0.002(5) -0.002(5) 
C26B 0.019(5) 0.022(6) 0.033(6) -0.006(5) 0.005(5) 0.004(5) 
C27B 0.016(5) 0.013(5) 0.026(5) 0.000(4) -0.007(4) 0.004(4) 
C28B 0.018(5) 0.016(5) 0.026(5) -0.004(4) 0.008(4) 0.004(4) 
C29B 0.035(6) 0.033(6) 0.024(5) 0.004(5) 0.005(5) 0.002(5) 
C30B 0.026(5) 0.029(5) 0.025(5) 0.004(5) 0.003(4) -0.005(5) 
C31B 0.019(5) 0.044(6) 0.019(5) -0.011(5) -0.001(5) -0.008(5) 
C32B 0.032(6) 0.072(8) 0.049(7) 0.005(6) 0.022(6) 0.007(6) 
C33B 0.050(7) 0.064(8) 0.055(7) 0.025(6) 0.015(6) 0.010(6) 
Sc1C 0.0174(10) 0.0195(10) 0.0238(10) -0.0003(8) 0.0017(8) 0.0002(8) 
Cl1C 0.0479(17) 0.0361(16) 0.078(2) 0.0048(15) 0.0038(15) -0.0169(14) 
Cl2C 0.0342(14) 0.0394(15) 0.0223(13) 0.0013(11) 0.0013(11) 0.0112(12) 
Cl3C 0.0323(14) 0.0432(15) 0.0231(13) 0.0008(11) -0.0017(11) 0.0090(12) 
N1C 0.024(5) 0.028(5) 0.015(4) 0.004(3) -0.001(3) 0.000(4) 
N2C 0.017(4) 0.023(5) 0.014(4) 0.007(3) -0.002(3) 0.006(4) 
N3C 0.021(4) 0.020(4) 0.016(4) 0.005(3) -0.003(3) 0.010(4) 
C1C 0.040(6) 0.014(5) 0.070(8) 0.004(5) 0.014(6) 0.004(5) 
C2C 0.021(6) 0.021(6) 0.023(5) 0.003(4) 0.005(4) 0.003(5) 
C3C 0.024(6) 0.010(5) 0.028(5) 0.001(4) -0.004(4) -0.001(5) 
C4C 0.043(7) 0.009(5) 0.045(6) -0.006(4) 0.014(5) -0.008(5) 
C5C 0.040(7) 0.028(7) 0.056(7) 0.000(5) 0.024(6) -0.016(6) 
C6C 0.023(6) 0.022(6) 0.043(6) 0.003(5) 0.014(5) 0.000(5) 
C7C 0.035(6) 0.007(5) 0.025(5) -0.003(4) 0.013(5) -0.006(5) 
C8C 0.017(5) 0.028(6) 0.019(5) -0.001(4) 0.004(4) 0.000(5) 
C9C 0.021(5) 0.033(6) 0.036(6) 0.002(5) 0.002(5) -0.002(5) 
C10C 0.009(5) 0.017(5) 0.028(6) -0.001(4) 0.001(5) 0.003(4) 
C11C 0.020(6) 0.017(5) 0.043(6) 0.000(5) 0.006(5) 0.002(5) 
C12C 0.024(6) 0.034(6) 0.043(7) -0.014(5) -0.002(5) 0.001(5) 
C13C 0.033(7) 0.024(6) 0.058(8) -0.001(5) 0.013(6) 0.003(5) 
C14C 0.033(7) 0.039(6) 0.042(7) 0.011(5) 0.005(6) 0.006(5) 
C15C 0.030(6) 0.022(6) 0.037(6) 0.006(5) 0.008(5) 0.012(5) 
C16C 0.038(6) 0.033(6) 0.025(6) 0.005(5) 0.011(5) 0.014(5) 
C17C 0.068(8) 0.077(8) 0.038(7) -0.012(6) -0.012(6) 0.041(7) 
C18C 0.073(8) 0.068(8) 0.047(7) 0.027(6) 0.020(6) 0.025(7) 
C19C 0.027(6) 0.029(6) 0.025(6) -0.006(5) 0.001(5) 0.005(5) 
C20C 0.052(7) 0.054(7) 0.036(6) 0.009(6) 0.002(5) 0.022(6) 
C21C 0.021(6) 0.064(7) 0.047(7) -0.018(6) 0.008(5) -0.007(5) 
C22C 0.017(5) 0.014(5) 0.030(6) 0.004(5) 0.005(4) -0.003(4) 
C23C 0.022(5) 0.023(6) 0.039(6) 0.001(5) 0.015(5) 0.001(5) 
C24C 0.030(6) 0.018(6) 0.046(7) 0.004(5) 0.015(5) 0.003(5) 
C25C 0.037(6) 0.020(6) 0.046(7) -0.018(6) 0.006(5) 0.003(5) 
C26C 0.028(6) 0.033(7) 0.038(6) -0.011(6) 0.002(5) -0.001(5) 
C27C 0.018(5) 0.029(6) 0.025(6) -0.005(5) 0.006(4) 0.006(5) 
C28C 0.034(6) 0.036(6) 0.026(6) -0.012(5) 0.004(5) -0.006(5) 
C29C 0.039(6) 0.041(6) 0.030(6) -0.002(5) 0.016(5) -0.008(5) 
C30C 0.035(6) 0.053(7) 0.027(6) -0.016(5) -0.002(5) -0.010(5) 
C31C 0.028(6) 0.018(5) 0.027(6) 0.006(4) -0.001(5) -0.002(5) 
C32C 0.043(6) 0.027(6) 0.044(6) -0.003(5) 0.011(5) 0.005(5) 
C33C 0.037(6) 0.042(6) 0.035(6) -0.003(5) -0.011(5) 0.007(5) 
Cl1S 0.126(3) 0.098(3) 0.115(3) 0.001(2) 0.019(3) 0.009(3) 
Cl2S 0.119(6) 0.047(4) 0.130(7) 0.017(4) 0.022(5) 0.000(4) 
Cl2S 0.061(5) 0.092(6) 0.134(7) 0.035(5) -0.012(4) 0.005(4) 
Cl3S 0.168(5) 0.100(3) 0.204(5) -0.026(3) 0.071(4) 0.006(3) 
Cl4S 0.144(4) 0.111(3) 0.107(3) -0.023(3) 0.049(3) -0.045(3) 
Cl5S 0.146(4) 0.093(3) 0.099(3) 0.012(2) 0.042(3) 0.018(3) 
Cl6S 0.114(3) 0.112(3) 0.090(3) -0.004(2) 0.022(2) -0.020(2) 
Cl7S 0.153(4) 0.137(4) 0.087(3) 0.060(3) -0.065(3) -0.065(3) 
Cl8S 0.0562(19) 0.0546(18) 0.078(2) 0.0076(17) 0.0058(16) 0.0044(16) 
C1S 0.116(12) 0.069(9) 0.128(13) 0.033(9) 0.067(10) -0.003(9) 
C2S 0.173(16) 0.062(10) 0.30(2) -0.072(12) 0.193(17) -0.034(10) 
C3S 0.163(14) 0.102(11) 0.071(9) 0.049(8) 0.079(10) 0.062(10) 
C4S 0.053(7) 0.063(8) 0.041(7) 0.007(6) -0.002(6) 0.000(6) 
 
_geom_special_details 
; 
 All esds (except the esd in the dihedral angle between two l.s. planes) 
 are estimated using the full covariance matrix.  The cell esds are taken 
 into account individually in the estimation of esds in distances, angles 
 and torsion angles; correlations between esds in cell parameters are only 
 used when they are defined by crystal symmetry.  An approximate (isotropic) 
 treatment of cell esds is used for estimating esds involving l.s. planes. 
; 
 
loop_ 
 _geom_bond_atom_site_label_1 
 _geom_bond_atom_site_label_2 
 _geom_bond_distance 
 _geom_bond_site_symmetry_2 
 _geom_bond_publ_flag 
Sc1A N2A 2.226(6) . ? 
Sc1A N1A 2.315(6) . ? 
Sc1A N3A 2.342(6) . ? 
Sc1A Cl2A 2.374(3) . ? 
Sc1A Cl1A 2.379(3) . ? 
Sc1A Cl3A 2.453(3) . ? 
N1A C2A 1.300(10) . ? 
N1A C10A 1.450(9) . ? 
N2A C3A 1.327(10) . ? 
N2A C7A 1.354(9) . ? 
N3A C8A 1.287(9) . ? 
N3A C22A 1.457(10) . ? 
C1A C2A 1.501(11) . ? 
C2A C3A 1.502(11) . ? 
C3A C4A 1.365(11) . ? 
C4A C5A 1.378(11) . ? 
C5A C6A 1.370(11) . ? 
C6A C7A 1.390(11) . ? 
C7A C8A 1.455(11) . ? 
C8A C9A 1.501(10) . ? 
C10A C11A 1.404(11) . ? 
C10A C15A 1.415(11) . ? 
C11A C12A 1.398(12) . ? 
C11A C19A 1.505(12) . ? 
C12A C13A 1.362(12) . ? 
C13A C14A 1.357(11) . ? 
C14A C15A 1.404(11) . ? 
C15A C16A 1.490(11) . ? 
C16A C18A 1.518(12) . ? 
C16A C17A 1.530(12) . ? 
C19A C20A 1.543(14) . ? 
C19A C21A 1.549(14) . ? 
C22A C27A 1.402(11) . ? 
C22A C23A 1.417(11) . ? 
C23A C24A 1.389(11) . ? 
C23A C31A 1.511(12) . ? 
C24A C25 1.345(11) . ? 
C25 C26A 1.362(11) . ? 
C26A C27A 1.390(11) . ? 
C27A C28A 1.525(11) . ? 
C28A C30A 1.509(10) . ? 
C28A C29A 1.539(10) . ? 
C31A C32A 1.540(12) . ? 
C31A C33A 1.553(13) . ? 
Sc1B N2B 2.234(6) . ? 
Sc1B N3B 2.320(6) . ? 
Sc1B N1B 2.322(6) . ? 
Sc1B Cl1B 2.383(2) . ? 
Sc1B Cl3B 2.387(2) . ? 
Sc1B Cl2B 2.470(2) . ? 
N1B C2B 1.280(9) . ? 
N1B C10B 1.457(10) . ? 
N2B C7B 1.340(9) . ? 
N2B C3B 1.341(9) . ? 
N3B C8B 1.298(9) . ? 
N3B C22B 1.443(9) . ? 
C1B C2B 1.493(10) . ? 
C2B C3B 1.488(11) . ? 
C3B C4B 1.373(10) . ? 
C4B C5B 1.373(11) . ? 
C5B C6B 1.376(11) . ? 
C6B C7B 1.402(10) . ? 
C7B C8B 1.497(11) . ? 
C8B C9B 1.487(10) . ? 
C10B C11B 1.392(11) . ? 
C10B C15B 1.394(10) . ? 
C11B C12B 1.376(11) . ? 
C11B C19B 1.522(11) . ? 
C12B C13B 1.388(11) . ? 
C13B C14B 1.347(11) . ? 
C14B C15B 1.398(11) . ? 
C15B C16B 1.531(11) . ? 
C16B C17B 1.515(12) . ? 
C16B C18B 1.525(12) . ? 
C19B C21B 1.536(11) . ? 
C19B C20B 1.539(11) . ? 
C22B C23B 1.385(10) . ? 
C22B C27B 1.411(10) . ? 
C23B C24B 1.378(10) . ? 
C23B C31B 1.527(10) . ? 
C24B C25B 1.388(11) . ? 
C25B C26B 1.370(11) . ? 
C26B C27B 1.375(10) . ? 
C27B C28B 1.539(10) . ? 
C28B C29B 1.507(10) . ? 
C28B C30B 1.541(10) . ? 
C31B C32B 1.514(11) . ? 
C31B C33B 1.518(12) . ? 
Sc1C N2C 2.240(6) . ? 
Sc1C N3C 2.330(6) . ? 
Sc1C N1C 2.348(6) . ? 
Sc1C Cl1C 2.361(3) . ? 
Sc1C Cl3C 2.380(3) . ? 
Sc1C Cl2C 2.440(3) . ? 
N1C C2C 1.291(9) . ? 
N1C C10C 1.459(9) . ? 
N2C C3C 1.355(9) . ? 
N2C C7C 1.362(9) . ? 
N3C C8C 1.312(9) . ? 
N3C C22C 1.452(9) . ? 
C1C C2C 1.494(10) . ? 
C2C C3C 1.490(11) . ? 
C3C C4C 1.384(10) . ? 
C4C C5C 1.378(11) . ? 
C5C C6C 1.371(11) . ? 
C6C C7C 1.387(10) . ? 
C7C C8C 1.459(10) . ? 
C8C C9C 1.473(10) . ? 
C10C C11C 1.406(11) . ? 
C10C C15C 1.406(11) . ? 
C11C C12C 1.381(11) . ? 
C11C C19C 1.530(11) . ? 
C12C C13C 1.374(11) . ? 
C13C C14C 1.386(12) . ? 
C14C C15C 1.395(11) . ? 
C15C C16C 1.515(12) . ? 
C16C C17C 1.534(11) . ? 
C16C C18C 1.537(11) . ? 
C19C C20C 1.508(11) . ? 
C19C C21C 1.527(11) . ? 
C22C C23C 1.407(11) . ? 
C22C C27C 1.412(11) . ? 
C23C C24C 1.403(11) . ? 
C23C C31C 1.497(11) . ? 
C24C C25C 1.378(11) . ? 
C25C C26C 1.367(11) . ? 
C26C C27C 1.371(11) . ? 
C27C C28C 1.532(11) . ? 
C28C C30C 1.514(11) . ? 
C28C C29C 1.534(10) . ? 
C31C C32C 1.485(10) . ? 
C31C C33C 1.562(11) . ? 
Cl1S C1S 1.683(12) . ? 
Cl2S C1S 1.663(14) . ? 
Cl2S C1S 1.536(14) . ? 
Cl3S C2S 1.732(12) . ? 
Cl4S C2S 1.633(12) . ? 
Cl5S C3S 1.742(11) . ? 
Cl6S C3S 1.722(11) . ? 
Cl7S C4S 1.716(9) . ? 
Cl8S C4S 1.754(10) . ? 
 
loop_ 
 _geom_angle_atom_site_label_1 
 _geom_angle_atom_site_label_2 
 _geom_angle_atom_site_label_3 
 _geom_angle 
 _geom_angle_site_symmetry_1 
 _geom_angle_site_symmetry_3 
 _geom_angle_publ_flag 
N2A Sc1A N1A 71.1(2) . . ? 
N2A Sc1A N3A 70.8(2) . . ? 
N1A Sc1A N3A 141.5(3) . . ? 
N2A Sc1A Cl2A 87.96(17) . . ? 
N1A Sc1A Cl2A 88.94(17) . . ? 
N3A Sc1A Cl2A 84.51(16) . . ? 
N2A Sc1A Cl1A 172.78(19) . . ? 
N1A Sc1A Cl1A 102.36(19) . . ? 
N3A Sc1A Cl1A 115.98(19) . . ? 
Cl2A Sc1A Cl1A 95.01(10) . . ? 
N2A Sc1A Cl3A 80.16(17) . . ? 
N1A Sc1A Cl3A 89.49(17) . . ? 
N3A Sc1A Cl3A 89.25(16) . . ? 
Cl2A Sc1A Cl3A 167.87(11) . . ? 
Cl1A Sc1A Cl3A 97.07(10) . . ? 
C2A N1A C10A 119.5(7) . . ? 
C2A N1A Sc1A 117.4(5) . . ? 
C10A N1A Sc1A 123.1(5) . . ? 
C3A N2A C7A 120.9(7) . . ? 
C3A N2A Sc1A 120.0(5) . . ? 
C7A N2A Sc1A 118.7(5) . . ? 
C8A N3A C22A 120.6(6) . . ? 
C8A N3A Sc1A 115.8(5) . . ? 
C22A N3A Sc1A 123.6(5) . . ? 
N1A C2A C1A 125.9(8) . . ? 
N1A C2A C3A 116.2(7) . . ? 
C1A C2A C3A 117.9(8) . . ? 
N2A C3A C4A 121.2(8) . . ? 
N2A C3A C2A 115.1(8) . . ? 
C4A C3A C2A 123.7(8) . . ? 
C3A C4A C5A 119.8(8) . . ? 
C6A C5A C4A 118.9(8) . . ? 
C5A C6A C7A 119.8(8) . . ? 
N2A C7A C6A 119.4(7) . . ? 
N2A C7A C8A 115.5(7) . . ? 
C6A C7A C8A 125.1(7) . . ? 
N3A C8A C7A 118.3(7) . . ? 
N3A C8A C9A 125.2(8) . . ? 
C7A C8A C9A 116.6(7) . . ? 
C11A C10A C15A 121.9(7) . . ? 
C11A C10A N1A 119.4(7) . . ? 
C15A C10A N1A 118.7(7) . . ? 
C12A C11A C10A 117.2(8) . . ? 
C12A C11A C19A 119.2(9) . . ? 
C10A C11A C19A 123.6(8) . . ? 
C13A C12A C11A 122.1(9) . . ? 
C12A C13A C14A 119.6(8) . . ? 
C13A C14A C15A 122.8(8) . . ? 
C14A C15A C10A 116.1(8) . . ? 
C14A C15A C16A 120.8(8) . . ? 
C10A C15A C16A 123.1(8) . . ? 
C15A C16A C18A 112.8(8) . . ? 
C15A C16A C17A 110.0(7) . . ? 
C18A C16A C17A 109.6(8) . . ? 
C11A C19A C20A 108.8(9) . . ? 
C11A C19A C21A 110.9(9) . . ? 
C20A C19A C21A 112.9(9) . . ? 
C27A C22A C23A 121.4(8) . . ? 
C27A C22A N3A 119.2(7) . . ? 
C23A C22A N3A 119.3(7) . . ? 
C24A C23A C22A 117.4(8) . . ? 
C24A C23A C31A 121.1(8) . . ? 
C22A C23A C31A 121.2(8) . . ? 
C25 C24A C23A 121.6(8) . . ? 
C24A C25 C26A 120.6(8) . . ? 
C25 C26A C27A 122.2(9) . . ? 
C26A C27A C22A 116.7(8) . . ? 
C26A C27A C28A 118.3(8) . . ? 
C22A C27A C28A 125.0(8) . . ? 
C30A C28A C27A 112.9(7) . . ? 
C30A C28A C29A 109.6(7) . . ? 
C27A C28A C29A 109.8(6) . . ? 
C23A C31A C32A 110.0(8) . . ? 
C23A C31A C33A 111.5(8) . . ? 
C32A C31A C33A 112.5(8) . . ? 
N2B Sc1B N3B 70.3(2) . . ? 
N2B Sc1B N1B 70.3(2) . . ? 
N3B Sc1B N1B 139.2(2) . . ? 
N2B Sc1B Cl1B 168.20(18) . . ? 
N3B Sc1B Cl1B 103.54(18) . . ? 
N1B Sc1B Cl1B 117.05(18) . . ? 
N2B Sc1B Cl3B 95.00(16) . . ? 
N3B Sc1B Cl3B 88.36(15) . . ? 
N1B Sc1B Cl3B 84.80(16) . . ? 
Cl1B Sc1B Cl3B 94.90(9) . . ? 
N2B Sc1B Cl2B 79.85(15) . . ? 
N3B Sc1B Cl2B 92.81(15) . . ? 
N1B Sc1B Cl2B 90.47(16) . . ? 
Cl1B Sc1B Cl2B 90.58(8) . . ? 
Cl3B Sc1B Cl2B 173.97(10) . . ? 
C2B N1B C10B 120.1(7) . . ? 
C2B N1B Sc1B 116.6(5) . . ? 
C10B N1B Sc1B 123.2(5) . . ? 
C7B N2B C3B 120.2(7) . . ? 
C7B N2B Sc1B 119.3(5) . . ? 
C3B N2B Sc1B 118.5(5) . . ? 
C8B N3B C22B 119.0(6) . . ? 
C8B N3B Sc1B 118.6(5) . . ? 
C22B N3B Sc1B 122.5(5) . . ? 
N1B C2B C3B 117.1(7) . . ? 
N1B C2B C1B 125.2(8) . . ? 
C3B C2B C1B 117.7(7) . . ? 
N2B C3B C4B 121.1(8) . . ? 
N2B C3B C2B 114.2(7) . . ? 
C4B C3B C2B 124.6(8) . . ? 
C3B C4B C5B 119.2(8) . . ? 
C6B C5B C4B 120.5(8) . . ? 
C5B C6B C7B 117.7(8) . . ? 
N2B C7B C6B 121.2(8) . . ? 
N2B C7B C8B 115.2(7) . . ? 
C6B C7B C8B 123.6(8) . . ? 
N3B C8B C9B 126.4(7) . . ? 
N3B C8B C7B 115.1(7) . . ? 
C9B C8B C7B 118.4(8) . . ? 
C11B C10B C15B 120.7(8) . . ? 
C11B C10B N1B 120.1(7) . . ? 
C15B C10B N1B 119.1(7) . . ? 
C12B C11B C10B 117.5(8) . . ? 
C12B C11B C19B 118.2(8) . . ? 
C10B C11B C19B 124.2(8) . . ? 
C11B C12B C13B 122.7(8) . . ? 
C14B C13B C12B 119.0(9) . . ? 
C13B C14B C15B 120.9(8) . . ? 
C14B C15B C10B 119.2(8) . . ? 
C14B C15B C16B 118.5(8) . . ? 
C10B C15B C16B 122.1(8) . . ? 
C17B C16B C18B 109.6(7) . . ? 
C17B C16B C15B 110.9(8) . . ? 
C18B C16B C15B 113.2(8) . . ? 
C11B C19B C21B 112.3(7) . . ? 
C11B C19B C20B 110.7(7) . . ? 
C21B C19B C20B 108.2(7) . . ? 
C23B C22B C27B 120.6(7) . . ? 
C23B C22B N3B 118.8(7) . . ? 
C27B C22B N3B 120.3(7) . . ? 
C24B C23B C22B 119.0(7) . . ? 
C24B C23B C31B 118.6(7) . . ? 
C22B C23B C31B 122.3(7) . . ? 
C23B C24B C25B 120.6(8) . . ? 
C26B C25B C24B 120.0(8) . . ? 
C25B C26B C27B 120.9(8) . . ? 
C26B C27B C22B 118.7(7) . . ? 
C26B C27B C28B 117.5(7) . . ? 
C22B C27B C28B 123.6(7) . . ? 
C29B C28B C27B 111.4(7) . . ? 
C29B C28B C30B 110.0(6) . . ? 
C27B C28B C30B 112.1(6) . . ? 
C32B C31B C33B 109.6(7) . . ? 
C32B C31B C23B 113.4(7) . . ? 
C33B C31B C23B 110.6(7) . . ? 
N2C Sc1C N3C 70.1(2) . . ? 
N2C Sc1C N1C 70.2(2) . . ? 
N3C Sc1C N1C 140.3(3) . . ? 
N2C Sc1C Cl1C 176.8(2) . . ? 
N3C Sc1C Cl1C 108.15(19) . . ? 
N1C Sc1C Cl1C 111.52(19) . . ? 
N2C Sc1C Cl3C 84.85(17) . . ? 
N3C Sc1C Cl3C 87.09(16) . . ? 
N1C Sc1C Cl3C 89.03(17) . . ? 
Cl1C Sc1C Cl3C 97.75(11) . . ? 
N2C Sc1C Cl2C 81.32(17) . . ? 
N3C Sc1C Cl2C 86.81(17) . . ? 
N1C Sc1C Cl2C 87.70(17) . . ? 
Cl1C Sc1C Cl2C 96.03(10) . . ? 
Cl3C Sc1C Cl2C 166.09(10) . . ? 
C2C N1C C10C 119.2(6) . . ? 
C2C N1C Sc1C 117.7(5) . . ? 
C10C N1C Sc1C 122.9(5) . . ? 
C3C N2C C7C 119.8(7) . . ? 
C3C N2C Sc1C 120.4(5) . . ? 
C7C N2C Sc1C 119.8(5) . . ? 
C8C N3C C22C 120.2(6) . . ? 
C8C N3C Sc1C 118.0(5) . . ? 
C22C N3C Sc1C 121.7(5) . . ? 
N1C C2C C3C 116.8(7) . . ? 
N1C C2C C1C 124.9(7) . . ? 
C3C C2C C1C 118.2(7) . . ? 
N2C C3C C4C 120.4(7) . . ? 
N2C C3C C2C 114.7(7) . . ? 
C4C C3C C2C 124.9(8) . . ? 
C5C C4C C3C 119.2(8) . . ? 
C6C C5C C4C 120.9(8) . . ? 
C5C C6C C7C 118.1(8) . . ? 
N2C C7C C6C 121.5(7) . . ? 
N2C C7C C8C 115.5(7) . . ? 
C6C C7C C8C 123.0(8) . . ? 
N3C C8C C7C 116.3(7) . . ? 
N3C C8C C9C 123.5(7) . . ? 
C7C C8C C9C 120.3(8) . . ? 
C11C C10C C15C 121.1(7) . . ? 
C11C C10C N1C 120.1(7) . . ? 
C15C C10C N1C 118.7(8) . . ? 
C12C C11C C10C 118.9(8) . . ? 
C12C C11C C19C 118.4(8) . . ? 
C10C C11C C19C 122.7(7) . . ? 
C13C C12C C11C 120.9(9) . . ? 
C12C C13C C14C 120.2(9) . . ? 
C13C C14C C15C 121.2(9) . . ? 
C14C C15C C10C 117.6(9) . . ? 
C14C C15C C16C 118.9(8) . . ? 
C10C C15C C16C 123.4(7) . . ? 
C15C C16C C17C 110.9(7) . . ? 
C15C C16C C18C 111.1(8) . . ? 
C17C C16C C18C 110.6(7) . . ? 
C20C C19C C11C 110.4(7) . . ? 
C20C C19C C21C 110.8(8) . . ? 
C11C C19C C21C 110.6(7) . . ? 
C23C C22C C27C 120.9(8) . . ? 
C23C C22C N3C 120.3(7) . . ? 
C27C C22C N3C 118.6(7) . . ? 
C24C C23C C22C 117.5(8) . . ? 
C24C C23C C31C 119.2(8) . . ? 
C22C C23C C31C 123.0(8) . . ? 
C25C C24C C23C 121.0(9) . . ? 
C26C C25C C24C 120.1(8) . . ? 
C25C C26C C27C 121.9(9) . . ? 
C26C C27C C22C 118.3(8) . . ? 
C26C C27C C28C 118.4(8) . . ? 
C22C C27C C28C 122.8(8) . . ? 
C30C C28C C29C 109.3(7) . . ? 
C30C C28C C27C 114.5(7) . . ? 
C29C C28C C27C 107.6(7) . . ? 
C32C C31C C23C 112.7(7) . . ? 
C32C C31C C33C 110.8(7) . . ? 
C23C C31C C33C 109.6(6) . . ? 
Cl2S C1S Cl2S 85.4(7) . . ? 
Cl2S C1S Cl1S 110.4(8) . . ? 
Cl2S C1S Cl1S 124.2(10) . . ? 
Cl4S C2S Cl3S 115.4(9) . . ? 
Cl6S C3S Cl5S 112.6(6) . . ? 
Cl7S C4S Cl8S 111.5(5) . . ? 
 
_diffrn_measured_fraction_theta_max    0.997 
_diffrn_reflns_theta_full              20.81 
_diffrn_measured_fraction_theta_full   0.997 
_refine_diff_density_max    0.569 
_refine_diff_density_min   -0.636 
_refine_diff_density_rms    0.076 
